# Supplementary material for: An in-depth analysis of the impact of environmental drivers on the variability of phytoplankton community in the Arabian Sea during 2010–2021
Source: Royal Society of Chemistry journal article supplement (doi:10.1039/d4em00385c), 2024-12-23
Supplement: d4em00385c1.pdf [file d4em00385c1.pdf]

## 1 SUPPLEMENTARY FILE

---

2

3

4

5

6

7

8

9

10

11

12

13

14

15

16

17

18

19

20

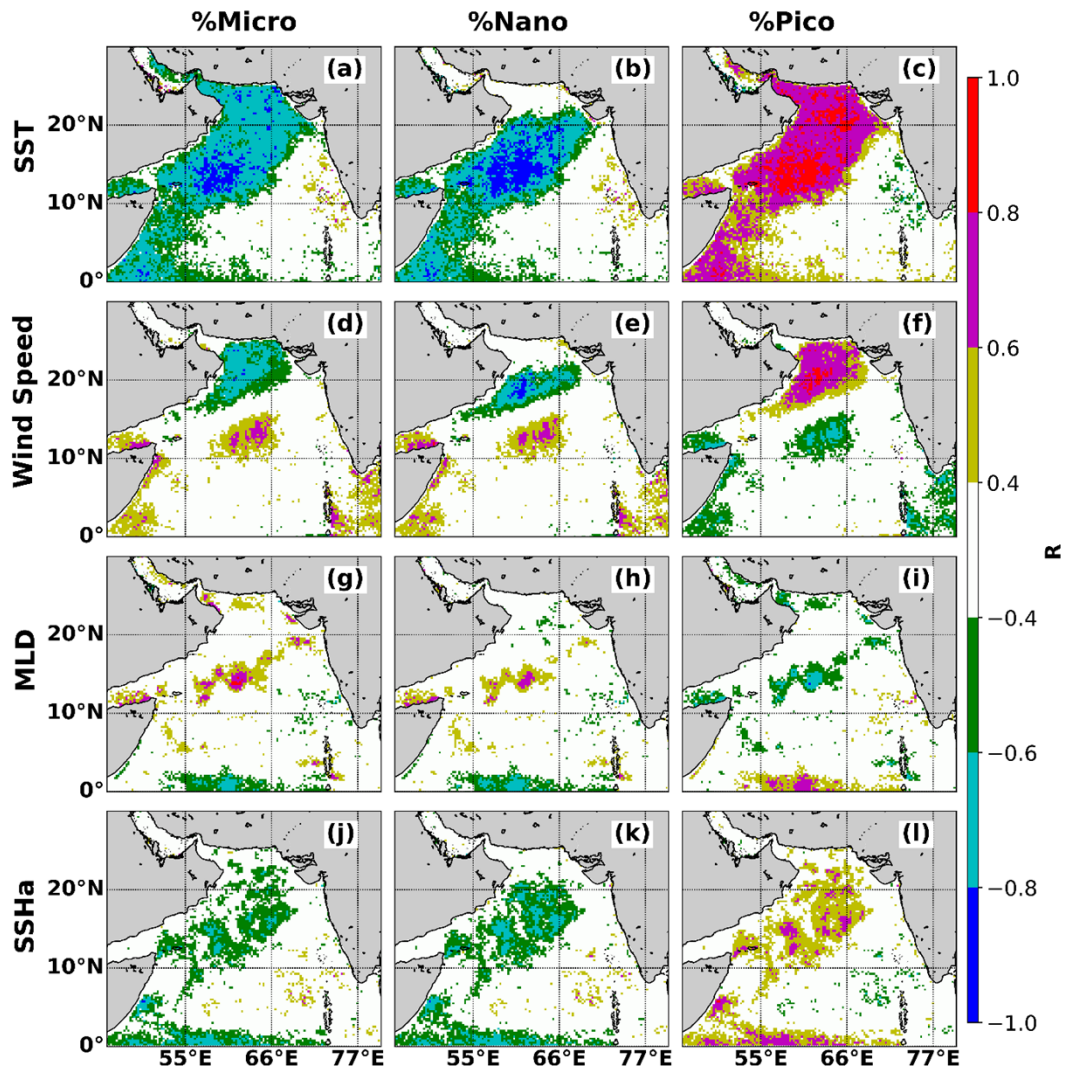

**Figure S1: (a-l)** Correlation of phytoplankton size class (PSC) with environmental drivers during pre-monsoon season.

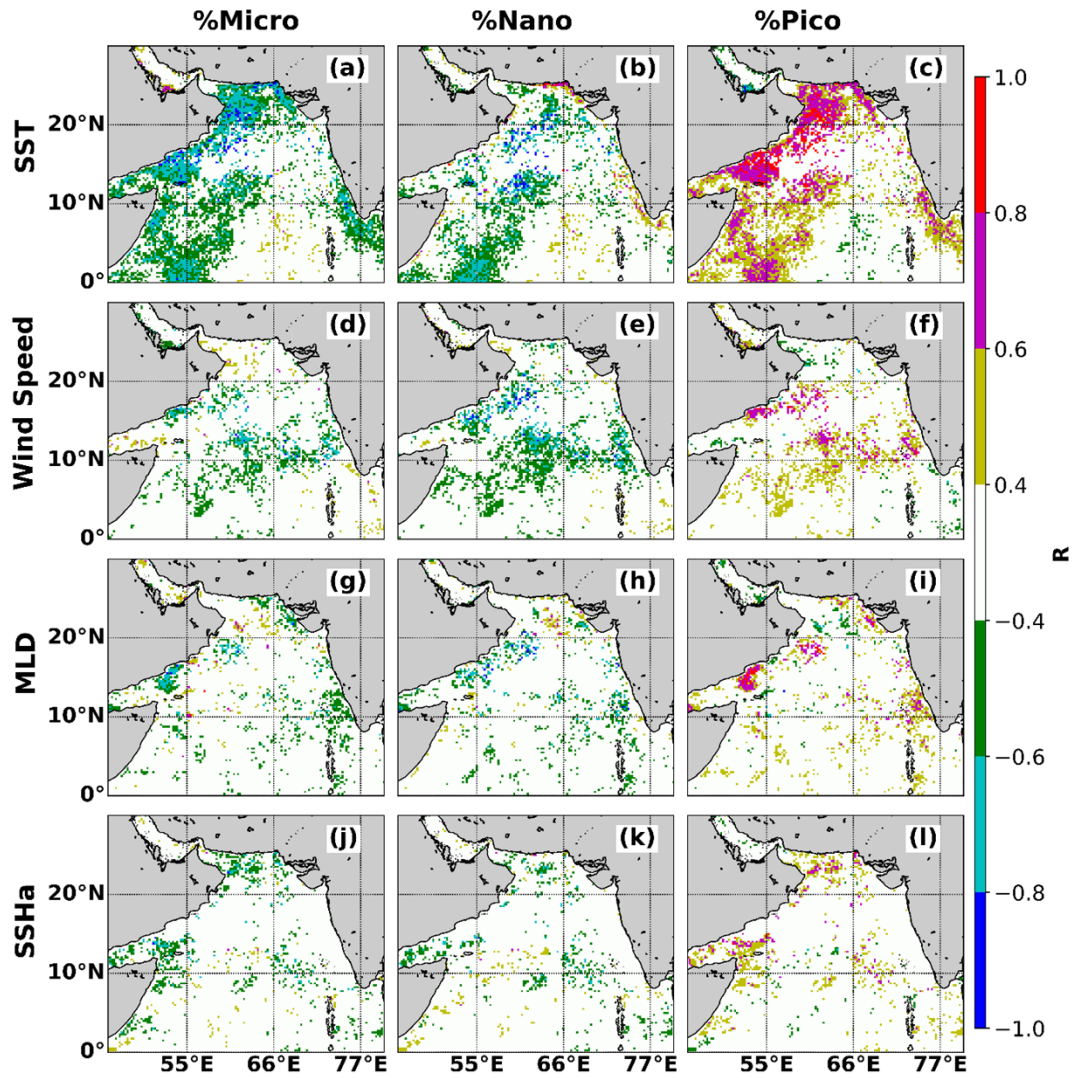

30

31 **Figure S2: (a–l)** Correlation of phytoplankton size class (PSC) with environmental drivers during  
 32 monsoon season.

33

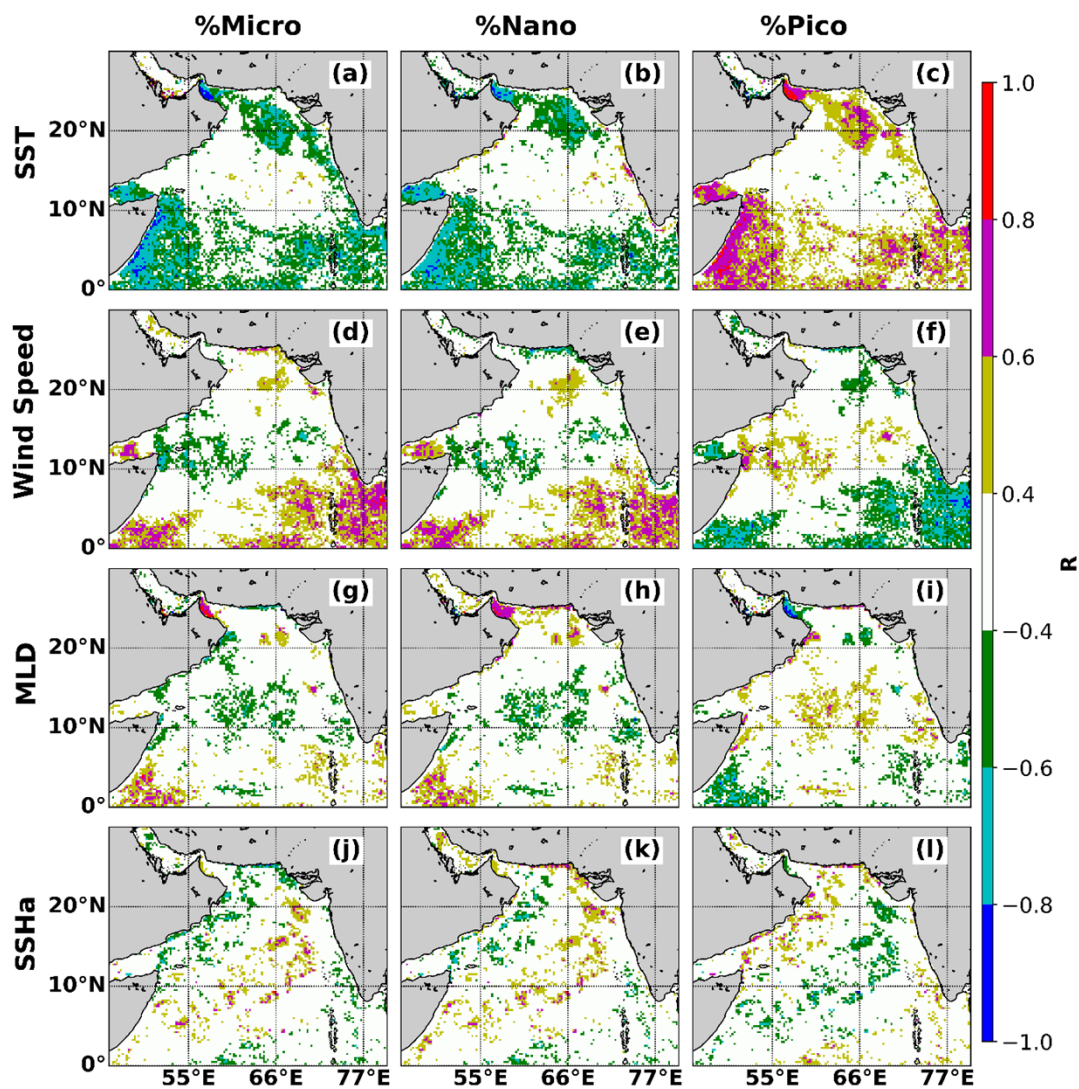

Figure S3: (a–l) Correlation of phytoplankton size class (PSC) with environmental drivers during post-monsoon season.
